# Supplementary material
Source: MDPI journal article supplement (https://www.mdpi.com/1424-2818/2/9/1097)
Supplement: s3 [file s3]

*Correction*

## **Correction: Diversity, Conflict and Growth: Theory and Evidence**

**Gerald Schneider**<sup>1,\*</sup> and **Nina Wiesehomeier**<sup>2</sup>

<sup>1</sup> Fachbereich Politik- und Verwaltungswissenschaft, Lehrstuhl für Internationale, University of Konstanz, Fach 86, Universitätsstr.10, 78457 Konstanz, Germany

<sup>2</sup> Instituto de Ciências Sociais da Universidade de Lisboa, Av. Aníbal de Bettencourt, 9, 1600-189 Lisbon, Portugal; E-Mail: Nina.Wiesehomeier@ics.ul.pt

\* Author to whom correspondence should be addressed; E-Mail: Gerald.Schneider@uni-konstanz.de; Tel.: +49-7531-88-3081; Fax: +49-7531-88-2774.

*Received: 20 September 2010 / Published: 27 September 2010*

---

We found an error in Table 4 in our paper published in *Diversity* [1]. A line for the results of religious fractionalization was missing, so that starting with model 5 the corresponding coefficients were mistakenly reported in the line of ethnic fractionalization. In the corrected table below, we added this missing line and report the results for religious fractionalization accordingly. Since this correction refers solely to the representation of the table, please note that it does not affect the results or conclusions of our paper. We apologize for any inconvenience caused to the readers.

**Table 4.** Civil War, Fractionalization and Polarization (One year periods, Exponential survival).

|                           | (1)<br>PrioCW        | (2)<br>PrioCW<br>Onset | (3)<br>Intwar 25    | (4)<br>Onset 25     | (5)<br>PrioCW      | (6)<br>PrioCW<br>Onset | (7)<br>Intwar 25    | (8)<br>Onset 25     |
|---------------------------|----------------------|------------------------|---------------------|---------------------|--------------------|------------------------|---------------------|---------------------|
| IGDP                      | 0.641**<br>(0.138)   | 0.681**<br>(0.128)     | 0.622***<br>(0.102) | 0.690***<br>(0.077) | 0.695*<br>(0.130)  | 0.705**<br>(0.109)     | 0.629***<br>(0.089) | 0.640***<br>(0.063) |
| IPopulation               | 1.344***<br>(0.142)  | 1.401***<br>(0.146)    | 1.337***<br>(0.112) | 1.236***<br>(0.091) | 1.280**<br>(0.135) | 1.372***<br>(0.154)    | 1.285***<br>(0.113) | 1.210**<br>(0.095)  |
| Primexp                   | 0.259<br>(0.460)     | 1.047<br>(1.158)       | 0.347<br>(0.442)    | 1.326<br>(1.113)    | 0.416<br>(0.679)   | 1.113<br>(1.306)       | 0.734<br>(0.837)    | 2.261<br>(1.799)    |
| Noncont                   | 1.355<br>(0.602)     | 1.200<br>(0.442)       | 1.434<br>(0.498)    | 0.985<br>(0.260)    | 1.255<br>(0.574)   | 1.195<br>(0.452)       | 1.425<br>(0.488)    | 1.036<br>(0.276)    |
| Democracy                 | 0.880<br>(0.233)     | 0.648<br>(0.206)       | 1.060<br>(0.218)    | 0.858<br>(0.188)    | 0.831<br>(0.222)   | 0.629<br>(0.205)       | 1.054<br>(0.218)    | 0.892<br>(0.193)    |
| Mountains                 | 1.002<br>(0.006)     | 0.999<br>(0.006)       | 1.002<br>(0.005)    | 1.000<br>(0.004)    | 1.005<br>(0.006)   | 0.999<br>(0.006)       | 1.005<br>(0.005)    | 1.001<br>(0.003)    |
| Ethnic Fract.<br>(Fearon) | 0.619<br>(0.563)     | 0.955<br>(0.788)       | 0.919<br>(0.685)    | 1.408<br>(0.700)    | -                  | -                      | -                   | -                   |
| Ethnic Pol.<br>(Fearon)   | 10.229***<br>(8.028) | 2.018<br>(1.488)       | 6.653***<br>(4.462) | 2.189<br>(1.061)    | -                  | -                      | -                   | -                   |
| Rel. Fract.<br>(Fearon)   | -                    | -                      | -                   | -                   | 4.743<br>(6.561)   | 2.576<br>(3.111)       | 2.682<br>(2.807)    | 0.609<br>(0.436)    |
| Rel. Pol.<br>(Fearon)     | -                    | -                      | -                   | -                   | 0.135<br>(0.254)   | 0.384<br>(0.652)       | 0.261<br>(0.361)    | 1.314<br>(1.273)    |
| Observations              | 4984                 | 4984                   | 4984                | 4984                | 5033               | 5033                   | 5033                | 5033                |
| N ° of<br>countries       | 132                  | 132                    | 132                 | 132                 | 134                | 134                    | 134                 | 134                 |
| N ° of failure            | 651                  | 71                     | 902                 | 142                 | 655                | 71                     | 916                 | 145                 |
| LR chi2                   | 44.57                | 56.81                  | 77.99               | 79.23               | 27.90              | 37.51                  | 46.43               | 52.37               |
| Prob > chi2               | 0.000                | 0.000                  | 0.000               | 0.000               | 0.000              | 0.000                  | 0.000               | 0.000               |

NOTE: Coefficients in the table are estimated using exponential survival regression and report the estimated multiplicative effect of a one-unit change in the independent variable on the mean time until failure (Hazard ratios). Income and population are used with their natural logarithm. Robust standard errors in parentheses. \*\*\*  $p < 0.01$ , \*\*  $p < 0.05$ , \*  $p < 0.1$ .

## Reference

1. Schneider, G.; Wiesehomeier, N. Diversity, conflict and growth: Theory and evidence. *Diversity* **2010**, *2*, 1097-1117.
